# Supplementary material for: Cancer Diagnosis Using Terahertz-Graphene-Metasurface-Based Biosensor with Dual-Resonance Response
Source: MDPI journal article supplement (doi:10.3390/nano12213889), 2022-11-03
Supplement: s1 [file s1]

# **Supporting information**

## **Cancer diagnosis using terahertz graphene metasurface based biosensor with dual-resonance response**

Chunjian Tan<sup>1,2,‡</sup>, Shaogang Wang<sup>1,2,‡</sup>, Shizhen Li<sup>2</sup>, Xu Liu<sup>a,b</sup>, Jia Wei<sup>3</sup>, Guoqi Zhang<sup>1,\*</sup>, Huaiyu Ye<sup>2,\*</sup>

<sup>1</sup>Electronic Components, Technology and Materials, Delft University of Technology, 2628 CD Delft, The Netherlands.

<sup>2</sup>Engineering Research Center of Integrated Circuits for Next-Generation Communications, Ministry of Education, School of Microelectronics, Southern University of Science and Technology, Shenzhen 518055, P. R. China.

<sup>3</sup> Bioland Laboratory, Guangzhou Regenerative Medicine and Health Guangdong Laboratory, Guangzhou 510005, P. R. China.

\* Correspondence: G.Q.Zhang@tudelft.nl and yehy@sustech.edu.cn

‡ These authors contributed equally to this work.

In Figure S1(a), we find that there is a red-shift with reduction of transmission strength for Dip1 and Dip2 when  $w_0=4\ \mu\text{m}$  and simultaneously  $w_1$  changes from  $6\ \mu\text{m}$  to  $2\ \mu\text{m}$ . In contrast, there is a blue-shift behavior for Dip1 and Dip2 when  $w_0$  is fixed as  $2\ \mu\text{m}$  and  $w_1$  increases from  $2\ \mu\text{m}$  to  $6\ \mu\text{m}$  except for Dip2 at  $w_0=2\ \mu\text{m}$  and  $w_1=6\ \mu\text{m}$ . Besides, the transmission window between Dip1 and Dip2 for  $w_0=2\ \mu\text{m}$  is larger than that of  $w_0=4\ \mu\text{m}$ . Therefore, the line width of two rings has a significant influence on the transmission spectra of the graphene metasurface.

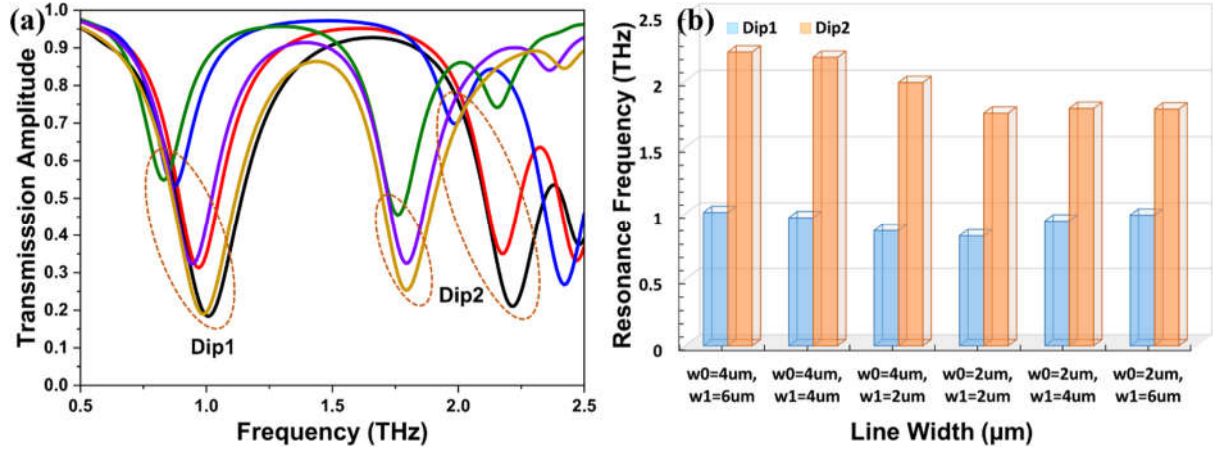

**Figure S1.** (a) Simulated transmission spectra and (b) resonance frequency of the graphene metasurface for different line widths of two graphene rings. Note that black, red, blue, olive, violet, and brown colors are denoted as  $w_0=4\ \mu\text{m}$ ,  $w_1=6\ \mu\text{m}$ ;  $w_0=4\ \mu\text{m}$ ,  $w_1=4\ \mu\text{m}$ ;  $w_0=4\ \mu\text{m}$ ,  $w_1=2\ \mu\text{m}$ ;  $w_0=2\ \mu\text{m}$ ,  $w_1=2\ \mu\text{m}$ ;  $w_0=2\ \mu\text{m}$ ,  $w_1=4\ \mu\text{m}$ ;  $w_0=2\ \mu\text{m}$ ,  $w_1=6\ \mu\text{m}$ , respectively.

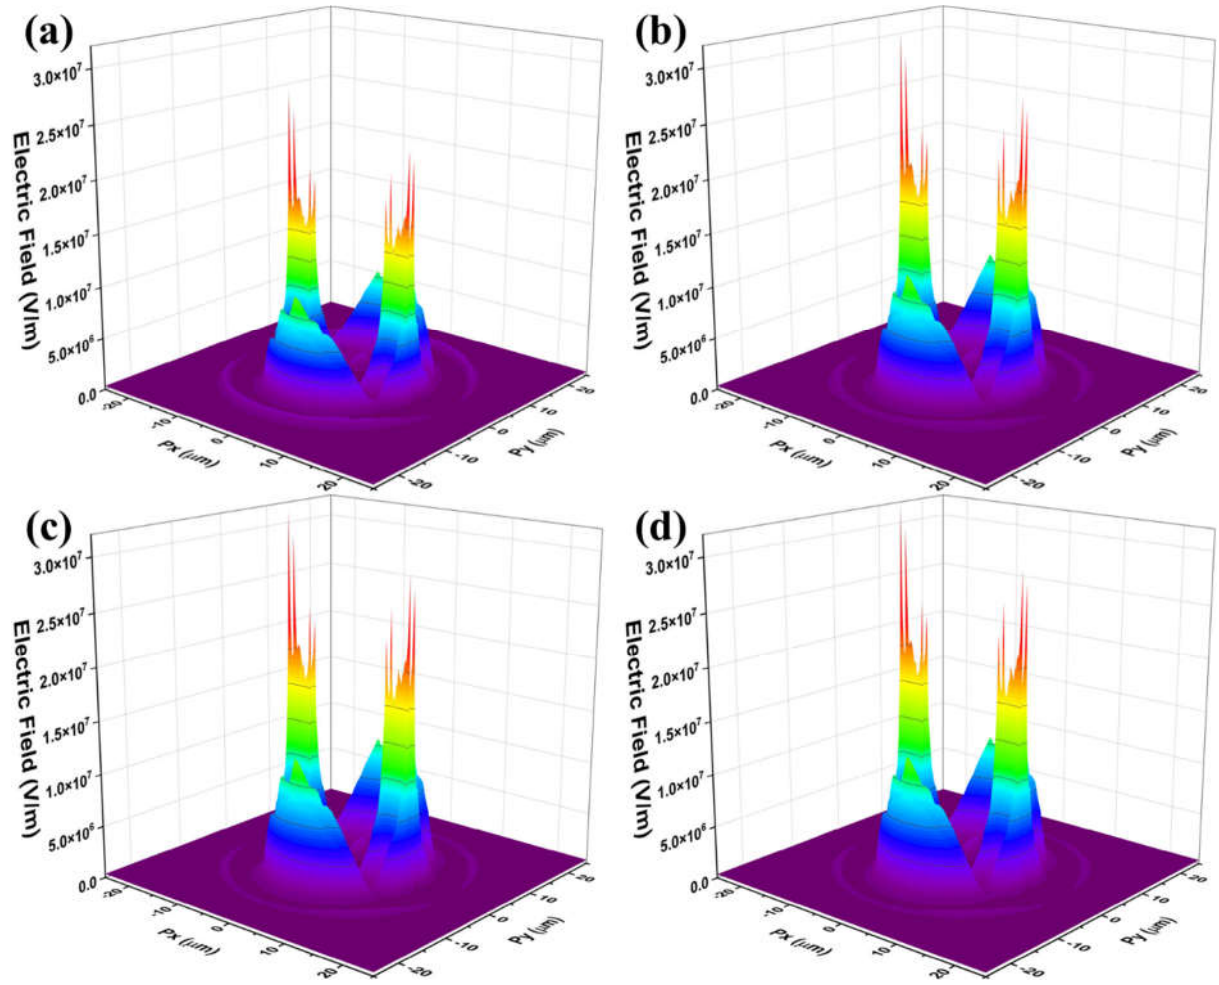

**Figure S2.** The 3D electric field of the graphene metasurface with the carrier density of (a)  $1 \times 10^{13} \text{ cm}^{-1}$ , (b)  $3 \times 10^{13} \text{ cm}^{-1}$ , (c)  $5 \times 10^{13} \text{ cm}^{-1}$ , and (d)  $7 \times 10^{13} \text{ cm}^{-1}$ .
